# Supplementary figures and images for: Gene Expression Programs of Human Smooth Muscle Cells: Tissue-Specific Differentiation and Prognostic Significance in Breast Cancers
Source: PLOS journal article supplement (doi:10.1371/journal.pgen.0030164), 2007-09-25

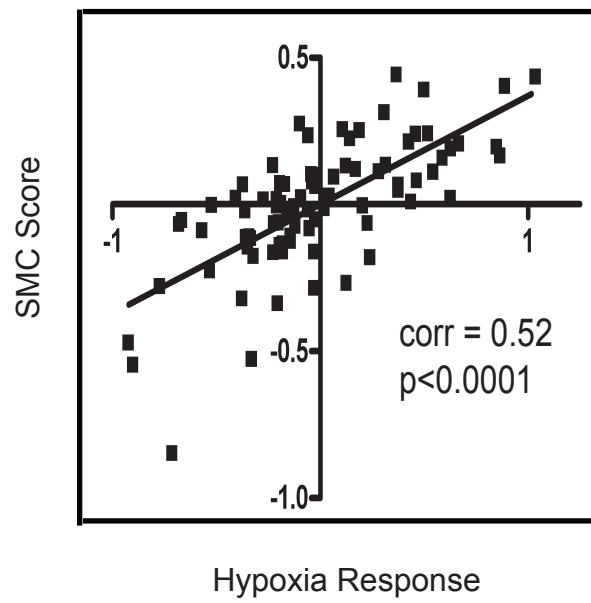

Supplement: S2 (10.1371/journal.pgen.0030164.s002) [file journal.pgen.0030164.s002]
